# Supplementary material for: Adherence to Positive Airway Pressure Therapy and Healthcare Resource Utilization and Costs Among Patients with Obstructive Sleep Apnea and Obesity
Source: Research Square preprint supplement (doi:10.21203/rs.3.rs-6986742/v1), 2025-07-03
Supplement: Supplementary file 1 [file 4f5d2d269177b73b0c7bcbba.xlsx]

## Sheet: Sheet1
Table 2. Summary of positive airway pressure (PAP) usage in years 1 and 2, overall and by adherence group
PAP Use	Overall n=173,6911	Adherent n=61,171	Intermediate n=67,938	Non-Adherent n=44,582	P-value1
Met CMS adherence2 (90 days), n (%)	117,992 (67.9)	61,171 (100.0)	56,821 (83.6)	0 (0.0)	<0.001
Year 1, mean (SD)
Hours per day	3.8 (2.8)	6.8 (1.2)	3.4 (1.8)	0.4 (0.6)	<0.001
Hours per use day	5.4 (2.0)	7.1 (1.1)	5.5 (1.2)	3.0 (1.6)	<0.001
Days per week	4.3 (2.6)	6.7 (0.4)	4.3 (1.9)	0.9 (1.1)	<0.001
Year 2, mean (SD)
Hours per day	3.3 (3.2)	7.0 (1.3)	2.1 (2.2)	0.1 (0.4)	<0.001
Hours per use day	6.1 (2.0)	7.3 (1.2)	5.4 (1.6)	3.1 (1.8)	<0.001
Days per week	3.5 (3.0)	6.7 (0.4)	2.6 (2.4)	0.2 (0.8)	<0.001
CMS, United States Centers for Medicare and Medicaid Services; PAP, positive airway pressure; SD, standard deviation.
1P-values are based on Kruskal–Wallis (continuous) and Pearson Chi-squared (categorical) tests.
2US CMS considers a patient adherent to PAP therapy if the device is used 4 or more hours per night on 70% of nights during a consecutive 30-day period during the first 90 days of initial use.
