# Supplementary material for: Adherence to Positive Airway Pressure Therapy and Healthcare Resource Utilization and Costs Among Patients with Obstructive Sleep Apnea and Obesity
Source: Research Square preprint supplement (doi:10.21203/rs.3.rs-6986742/v1), 2025-07-03
Supplement: Supplementary file 2 [file 7920e59a38c89cbbf2e541eb.docx]

**Supplementary Information**

**Sert Kuniyoshi FH, et al. Adherence to Positive Airway Pressure Therapy and Healthcare Resource Utilization and Costs Among Patients with Obstructive Sleep Apnea and Obesity**

Supplemental Table 1. ICD-10 codes used to identify obesity and comorbid conditions

| **Category** | **Condition** | **Codes** |
| --- | --- | --- |
| Obesity | Obesity | Z68.3x, E66.09, E66.1, E66.8, E66.9 |
|  | Morbid obesity | Z68.4x, E66.01, E66.2 |
| Cardiac conditions | Coronary artery disease | I20.x-I25.x |
| Heart failure | I11.0, I13.0, I50.x, I97.13x, I09.81 |
| Atrial fibrillation | I48.0x-I48.2x, I48.91 |
| Pulmonary hypertension | I27.2x |
| Cerebrovascular disease | I6x.x |
| Other arrhythmia | I47.x, I49.x |
| Atrial flutter | I48.3x-I48.4x, I48.92 |
| Respiratory conditions | Asthma | J45.x |
| Chronic obstructive pulmonary disease | J41.x-J44.x |
| Pneumonia | J12.x-J18.x |
| Affective conditions | Psychotic disorders | F2x.x, F30.x-F31.x |
| Other mood disorders | F42.x-F45.x, F48.x |
| Depression | F32.x-F34.x, F39.x |
| Anxiety | F40.x-F41.x |
| Other conditions | Somnolence | R40.0x |
| Type 2 diabetes | E11.x |
| Hypertension | I10, I11.x, I12.x, I13.x, I15.x |
| Hyperlipidemia | E78.0x-E78.5x |
| Gastroesophageal reflux disease | K21.x |
| Cancer | Cxx.x |
| Musculoskeletal pain | G89.2, G89.29, M25.5, M25.50, M25.55.x, M25.56.x, M25.57.x, M54, M54.00, M54.01, M54.03, M54.1, 54.2, M54.3.x, M54.4.x, M54.5, M54.6, M54.8.x, M54.9, M62.83.x, M79.1, M79.10, M79.12, M79.18, M79.6, M79.60, M79.604, M79.605, M79.606  M79.609, M79.65.x, M79.66.x, M79.67.x, R52 |
| Psoriasis | L40.x |
| Osteoarthritis | M15.x-M19, M19.9x |

ICD-10, International Classification of Diseases, Tenth Revision.

Supplemental Table 2. Lifestyle intervention procedure codes

| **Code Type** | **Procedure Code** |
| --- | --- |
| CPT | 99381, 99382, 99383, 99384, 99385, 99386, 99387, 99391, 99392, 99393, 99394, 99395, 99396, 99397, 99401, 99402, 99403, 99404, 99411, 99412, 97802, 97803, 97804, 0359T, 0360T, 0361T, 0362T, 0363T, 0364T, 0365T, 0366T, 0367T, 0368T, 0369T, 0370T, 0371T, 0372T, 0373T, 0374T, 90804, 90805, 90806, 90807, 90808, 90809, 90816, 90817, 90818, 90819, 90821, 90822, 90875, 90876, 92524, 96115, 96116, 96121, 96127, 96150, 96151, 96152, 96153, 96154, 96155, 96156, 96158, 96159, 96164, 96165, 96167, 96168, 96170, 96171, 97151, 97152, 97153, 97154, 97155, 97156, 97157, 97158, 99483, 99484, 99492, 99493, 99494, 0403T, 0488T, 96161 |
| HCPCS | G0447, G0473, S9449, S9452, S9470, G0270, G0271, G0446, G0502, G0503, G0504, G0507, G0511, G0512, H0002, H0004, H0017, H0018, H0019, H0023, H0024, H0025, H0030, H1011, H2012, H2019, H2020, T1040, T1041, T2048, G0444, S3005 |

CPT, Current Procedural Terminology; HCPCS, Healthcare Common Procedure Coding System

Supplemental Table 3. Baseline characteristics after applying inverse probability of treatment weighting (IPTW), by adherence group

|  | **Adherence** | | | **Standardized Mean Difference** | | |
| --- | --- | --- | --- | --- | --- | --- |
|  | **Adherent**  **n=61,171** | **Intermediate**  **n=67,938** | **Non-adherent**  **n=44,582** | **A-I** | **A-N** | **I-N** |
| Female, n (%) | 28,407 (46.4%) | 31,594 (46.5%) | 20,669 (46.4%) | 0.00 | 0.00 | 0.00 |
| Age group, n (%) |  |  |  | 0.01 | 0.01 | 0.01 |
| 18-44 | 16,998 (27.8%) | 18,603 (27.4%) | 12,305 (27.6%) |  |  |  |
| 45-54 | 18,183 (29.7%) | 20,215 (29.8%) | 13,302 (29.8%) |  |  |  |
| 55-64 | 18,824 (30.8%) | 21,027 (31.0%) | 13,796 (31.0%) |  |  |  |
| 65-69 | 3,358 (5.5%) | 3,801 (5.6%) | 2,445 (5.5%) |  |  |  |
| ≥70 | 3,808 (6.2%) | 4,292 (6.3%) | 2,734 (6.1%) |  |  |  |
| Payer, n (%) |  |  |  | 0.01 | 0.01 | 0.01 |
| Commercial | 41,363 (67.6%) | 46,202 (68.0%) | 30,403 (68.2%) |  |  |  |
| Medicaid | 12,959 (21.2%) | 14,013 (20.6%) | 9,265 (20.8%) |  |  |  |
| Medicare Advantage | 5,394 (8.8%) | 6,104 (9.0%) | 3,844 (8.6%) |  |  |  |
| Dual eligible | 1,455 (2.4%) | 1,619 (2.4%) | 1,070 (2.4%) |  |  |  |
| Region |  |  |  | 0.01 | 0.01 | 0.01 |
| West | 9,886 (16.2%) | 10,863 (16.0%) | 7,092 (15.9%) |  |  |  |
| South | 17,905 (29.3%) | 19,705 (29.0%) | 13,097 (29.4%) |  |  |  |
| Northeast | 8,244 (13.5%) | 9,261 (13.6%) | 6,033 (13.5%) |  |  |  |
| Midwest | 25,136 (41.1%) | 28,110 (41.4%) | 18,360 (41.2%) |  |  |  |
| Obesity/BMI, n (%) |  |  |  | 0.00 | 0.00 | 0.00 |
| Morbid (severe) obesity | 30,161 (49.3%) | 33,377 (49.1%) | 21,982 (49.3%) |  |  |  |
| Obesity | 31,010 (50.7%) | 34,561 (50.9%) | 22,600 (50.7%) |  |  |  |
| Comorbid conditions |  |  |  |  |  |  |
| Number per patient, mean (SD) | 4.3 (2.8) | 4.3 (2.8) | 4.3 (2.7) | 0.02 | 0.01 | -0.01 |
| Cardiac conditions, n (%) |  |  |  |  |  |  |
| Coronary artery disease | 9,139 (14.9%) | 10,001 (14.7%) | 6,637 (14.9%) | 0.01 | 0.00 | 0.00 |
| Atrial fibrillation | 4,646 (7.6%) | 5,067 (7.5%) | 3,395 (7.6%) | 0.01 | 0.00 | -0.01 |
| Pulmonary hypertension | 1,774 (2.9%) | 1,965 (2.9%) | 1,339 (3.0%) | 0.00 | -0.01 | -0.01 |
| Hypertension | 41,107 (67.2%) | 45,540 (67.0%) | 29,928 (67.1%) | 0.00 | 0.00 | 0.00 |
| Cerebrovascular disease | 3,491 (5.7%) | 3,847 (5.7%) | 2,537 (5.7%) | 0.00 | 0.00 | 0.00 |
| Other arrhythmia | 5,723 (9.4%) | 6,312 (9.3%) | 4,201 (9.4%) | 0.00 | 0.00 | 0.00 |
| Atrial flutter | 1,001 (1.6%) | 1,095 (1.6%) | 745 (1.7%) | 0.00 | 0.00 | 0.00 |
| Heart failure | 5,343 (8.7%) | 5,811 (8.6%) | 3,883 (8.7%) | 0.01 | 0.00 | -0.01 |
| Respiratory conditions, n (%) |  |  |  |  |  |  |
| Asthma | 11,972 (19.6%) | 13,099 (19.3%) | 8,645 (19.4%) | 0.01 | 0.00 | 0.00 |
| Chronic obstructive pulmonary disease | 7,234 (11.8%) | 7,816 (11.5%) | 5,205 (11.7%) | 0.01 | 0.00 | -0.01 |
| Pneumonia | 3,464 (5.7%) | 3,781 (5.6%) | 2,499 (5.6%) | 0.00 | 0.00 | 0.00 |
| Affective conditions, n (%) |  |  |  |  |  |  |
| Psychotic disorders | 3,575 (5.8%) | 3,717 (5.5%) | 2,493 (5.6%) | 0.02 | 0.01 | -0.01 |
| Other mood disorders | 5,891 (9.6%) | 6,334 (9.3%) | 4,223 (9.5%) | 0.01 | 0.01 | -0.01 |
| Depression | 16,686 (27.3%) | 18,223 (26.8%) | 12,069 (27.1%) | 0.01 | 0.00 | -0.01 |
| Anxiety | 16,454 (26.9%) | 17,942 (26.4%) | 11,877 (26.6%) | 0.01 | 0.01 | -0.01 |
| Other conditions, n (%) |  |  |  |  |  |  |
| Type 1 diabetes | 1,421 (2.32%) | 1,583 (2.3%) | 1,059 (2.4%) | 0.00 | 0.00 | 0.00 |
| Type 2 diabetes | 18,599 (30.4%) | 20,441 (30.1%) | 13,518 (30.3%) | 0.01 | 0.00 | -0.01 |
| Hyperlipidemia | 34,586 (56.5%) | 38,262 (56.3%) | 25,184 (56.5%) | 0.00 | 0.00 | 0.00 |
| Gastroesophageal reflux disease | 19,227 (31.4%) | 21,095 (31.1%) | 13,918 (31.2%) | 0.01 | 0.00 | 0.00 |
| Cancer | 4,074 (6.7%) | 4,523 (6.7%) | 2,948 (6.6%) | 0.00 | 0.00 | 0.00 |
| Musculoskeletal pain | 34,058 (55.7%) | 37,686 (55.5%) | 24,715 (55.4%) | 0.00 | 0.00 | 0.00 |
| Psoriasis | 1,285 (2.1%) | 1,425 (2.1%) | 946 (2.1%) | 0.00 | 0.00 | 0.00 |
| Osteoarthritis | 12,961 (21.2%) | 14,300 (21.1%) | 9,356 (21.0%) | 0.00 | 0.00 | 0.00 |
| No other comorbidity | 2,850 (4.7%) | 3,162 (4.7%) | 2,021 (4.5%) | 0.00 | 0.01 | 0.01 |
| Weight management regimens, n (%) |  |  |  |  |  |  |
| Lifestyle intervention | 14,639 (23.9%) | 16,424 (24.2%) | 10,616 (23.8%) | -0.01 | 0.00 | 0.01 |
| GLP-1 receptor agonist2 | 2,348 (3.8%) | 2,596 (3.8%) | 1,724 (3.9%) | 0.00 | 0.00 | 0.00 |
| Healthy user proxy variables |  |  |  |  |  |  |
| Statin PDC, mean (SD) | 0.80 (.24) | 0.80 (0.24) | 0.80 (0.24) | -0.01 | 0.00 | 0.01 |
| Beta blocker PDC, mean (SD) | 0.81 (0.24) | 0.81 (0.24) | 0.81 (0.24) | -0.01 | -0.01 | 0.00 |
| Antihypertensive PDC, mean (SD) | 0.87 (0.21) | 0.87 (0.21) | 0.87 (0.21) | -0.01 | -0.01 | 0.00 |
| Had wellness visit, n (%) | 24,989 (40.9%) | 27,968 (41.2%) | 18,206 (40.8%) | -0.01 | 0.00 | 0.01 |
| Had flu vaccine, n (%) | 18,384 (30.1%) | 20,340 (29.9%) | 13,437 (30.1%) | 0.00 | 0.00 | 0.00 |
| Baseline HCRU, n (%) |  |  |  |  |  |  |
| All-cause emergency room visit | 21,479 (35.1%) | 23,568 (34.7%) | 15,530 (34.8%) | 0.01 | 0.01 | 0.00 |
| All-cause hospitalization | 7,671 (12.5%) | 8,388 (12.4%) | 5,604 (12.6%) | 0.01 | 0.00 | -0.01 |
| Baseline HCRU, per patient mean (SD) |  |  |  |  |  |  |
| All-cause emergency room visit | 0.75 (1.87) | 0.73 (1.84) | 0.74 (1.90) | 0.01 | 0.01 | 0.00 |
| All-cause inpatient hospitalization | 0.17 (0.54) | 0.17 (0.56) | 0.17 (0.54) | 0.00 | 0.00 | 0.00 |
| Baseline healthcare costs, mean USD (SD) |  |  |  |  |  |  |
| Emergency room visit | 744 (2,013) | 722 (2,007) | 715 (1,930) | 0.01 | 0.01 | 0.00 |
| Inpatient hospitalization | 2,413 (9,115) | 2,405 (9,374) | 2,404 (8,995) | 0.00 | 0.00 | 0.00 |
| Total | 11,663 (17,256) | 11,865 (18,175) | 11,905 (18,349) | -0.01 | -0.01 | 0.00 |

A, adherent; BMI, body mass index; GLP-1, glucagon-like peptide 1 receptor agonist; HCRU, healthcare resource use; I, intermediate adherence; N, non-adherent; PDC, proportion of days covered; USD, United States dollars.
