# Supplementary material for: Adherence to Positive Airway Pressure Therapy and Healthcare Resource Utilization and Costs Among Patients with Obstructive Sleep Apnea and Obesity
Source: Research Square preprint supplement (doi:10.21203/rs.3.rs-6986742/v1), 2025-07-03
Supplement: Supplementary file 3 [file baddb12c4190525f89a940e9.xlsx]

## Sheet: Sheet1
Table 1. Unadjusted baseline characteristics, healthcare resource use, and costs, overall and by adherence group
Characteristic	Overall n=173,691	Adherent n=61,171	Intermediate n=67,938	Non-Adherent n=44,582	P-value1
Female, n (%)	80,854 (46.6)	24,869 (40.7)	33,700 (49.6)	22,285 (50.0)	<0.001
Age, mean years (SD)	51.6 (12.0)	53.0 (11.4)	51.6 (12.0)	49.6 (12.5)	<0.001
Payer, n (%)					<0.001
Commercial	118,109 (68.0)	47,890 (78.3)	46,203 (68.0)	24,016 (53.9)
Medicaid	35,813 (20.6)	6,393 (10.5)	13,842 (20.4)	15,578 (34.9)
Medicare Advantage	15,645 (9.0)	6,119 (10.0)	6,226 (9.2)	3,300 (7.4)
Dual eligible	4,124 (2.4)	769 (1.3)	1,667 (2.5)	1,688 (3.8)
Region					<0.001
West	27,718 (16.0)	8,737 (14.3)	10,343 (15.2)	8,638 (19.4)
South	50,344 (29.0)	16,213 (26.5)	19,995 (29.4)	14,136 (31.7)
Northeast	23,637 (13.6)	7,144 (11.7)	8,940 (13.2)	7,553 (16.9)
Midwest	71,992 (41.5)	29,077 (47.5)	28,660 (42.2)	14,255 (32.0)
Obesity/BMI, n (%)					<0.001
Severe obesity (BMI ≥40kg/m2)	85,322 (49.1)	29,476 (48.2)	32,601 (48.0)	23,245 (52.1)
Obesity (BMI ≥30 and <40kg/m2)	88,369 (50.9)	31,695 (51.8)	35,337 (52.0)	21,337 (47.9)
Comorbid conditions
Number per patient, mean (SD)	4.3 (2.7)	3.9 (2.5)	4.4 (2.8)	4.8 (2.9)	<0.001
Cardiac conditions, n (%)
Coronary artery disease	25,540 (14.7)	8,103 (13.3)	10,080 (14.8)	7,357 (16.5)	<0.001
Atrial fibrillation	12,926 (7.4)	5,134 (8.4)	4,799 (7.1)	2,993 (6.7)	<0.001
Pulmonary hypertension	5,006 (2.9)	1,640 (2.7)	1,921 (2.8)	1,445 (3.2)	<0.001
Hypertension	116,399 (67.0)	40,483 (66.2)	45,398 (66.8)	30,518 (68.5)	<0.001
Cerebrovascular disease	9,812 (5.7)	2,886 (4.7)	3,978 (5.9)	2,948 (6.6)	<0.001
Other arrhythmia	16,095 (9.3)	5,630 (9.2)	6,315 (9.3)	4,150 (9.3)	0.799
Atrial flutter	2,803 (1.6)	1,154 (1.9)	1,004 (1.5)	645 (1.5)	<0.001
Heart failure	14,823 (8.5)	4,387 (7.2)	5,803 (8.5)	4,633 (10.4)	<0.001
Respiratory conditions, n (%)
Asthma	33,513 (19.3)	9,494 (15.5)	13,256 (19.5)	10,763 (24.1)	<0.001
COPD	19,960 (11.5)	5,325 (8.7)	7,817 (11.5)	6,818 (15.3)	<0.001
Pneumonia	9,659 (5.6)	2,896 (4.7)	3,801 (5.6)	2,962 (6.6)	<0.001
Affective conditions, n (%)
Psychotic disorders	9,518 (5.5)	1,661 (2.7)	3,887 (5.7)	3,970 (8.9)	<0.001
Other mood disorders	16,210 (9.3)	4,206 (6.9)	6,713 (9.9)	5,291 (11.9)	<0.001
Depression	46,597 (26.8)	12,933 (21.1)	19,480 (28.7)	14,184 (31.8)	<0.001
Anxiety	45,878 (26.4)	12,869 (21.0)	18,964 (27.9)	14,045 (31.5)	<0.001
Other conditions, n (%)
Type 1 diabetes	4,049 (2.3)	1,161 (1.9)	1,630 (2.4)	1,258 (2.8)	<0.001
Type 2 diabetes	52,262 (30.1)	15,999 (26.2)	20,766 (30.6)	15,497 (34.8)	<0.001
Hyperlipidemia	97,810 (56.3)	34,724 (56.8)	38,199 (56.2)	24,887 (55.8)	0.008
Gastroesophageal reflux disease	53,912 (31.0)	16,680 (27.3)	21,689 (31.9)	15,543 (34.9)	<0.001
Cancer	11,554 (6.7)	4,296 (7.0)	4,579 (6.7)	2,679 (6.0)	<0.001
Musculoskeletal pain	96,402 (55.5)	30,015 (49.1)	38,571 (56.8)	27,816 (62.4)	<0.001
Psoriasis	3,643 (2.1)	1,376 (2.3)	1,363 (2.0)	904 (2.0)	0.005
Osteoarthritis	36,604 (21.1)	11,552 (18.9)	14,772 (21.7)	10,280 (23.1)	<0.001
No other comorbidity	8,111 (4.7)	3,524 (5.8)	2,987 (4.4)	1,600 (3.6)	<0.001
Weight management regimens, n (%)
Lifestyle intervention	42,007 (24.2)	14,882 (24.3)	16,405 (24.2)	10,720 (24.1)	0.545
GLP-1 receptor agonist2	6,625 (3.8)	1,919 (3.1)	2,653 (3.9)	2,053 (4.6)	<0.001
Healthy user proxy variables
Statin PDC, mean (SD)	0.80 (0.24)	0.83 (0.23)	0.79 (0.25)	0.76 (0.26)	<0.001
Beta blocker PDC, mean (SD)	0.81 (0.24)	0.84 (0.23)	0.81 (0.24)	0.78 (0.26)	<0.001
Antihypertensive PDC, mean (SD)	0.87 (0.21)	0.89 (0.19)	0.87 (0.21)	0.84 (0.23)	<0.001
Had wellness visit, n (%)	71,481 (41.2)	26,952 (44.1)	27,888 (41.1)	16,641 (37.3)	<0.001
Had flu vaccine, n (%)	51,989 (29.9)	18,883 (30.9)	20,605 (30.3)	12,501 (28.0)	<0.001
Baseline HCRU, n (%)
Physician visits	171,211 (98.6)	59,987 (98.1)	67,073 (98.7)	44,151 (99.0)	<0.001
All-cause emergency room visit	60,287 (34.7)	16,217 (26.5)	23,886 (35.2)	20,184 (45.3)	<0.001
All-cause hospitalization	21,374 (12.3)	6,408 (10.5)	8,325 (12.3)	6,641 (14.9)	<0.001
Baseline HCRU, per patient mean (SD)
Physician visits	11.54 (11.62)	9.40 (9.11)	11.91 (12.06)	13.91 (13.36)	<0.001
All-cause emergency room visit	0.73 (1.87)	0.44 (1.14)	0.72 (1.76)	1.15 (2.61)	<0.001
All-cause inpatient hospitalization	0.17 (0.55)	0.13 (0.45)	0.17 (0.56)	0.21 (0.64)	<0.001
Baseline healthcare costs, mean USD (SD)
Physician visits	2,021 (2,748)	1,828 (2,708)	2,082 (2,801)	2,192 (2,707)	<0.001
Emergency room visit	718 (1,959)	457 (1,320)	713 (1,930)	1,085 (2,579)	<0.001
Inpatient hospitalization	2,380 (9,207)	1,933 (8,021)	2,388 (9,359)	2,980 (10,386)	<0.001
Total3	11,724 (17,841)	9,983 (15,669)	11,951 (18,062)	13,765 (19,941)	<0.001
BMI, body mass index; COPD, Chronic obstructive pulmonary disease; GLP-1, glucagon-like peptide 1 receptor agonist; HCRU, healthcare resource use; PDC, proportion of days covered; USD, United States dollars.
1P-values are based on Kruskal–Wallis (continuous) and Pearson Chi-squared (categorical) tests.
2GLP-1 receptor agonists are used in the treatment of type 2 diabetes and/or obesity.
3Total healthcare costs include costs for inpatient hospitalizations, outpatient hospitalizations, emergency room visits, office visits, sleep tests, apnea equipment, durable medical equipment, prescriptions, and other healthcare costs.
