# Supplementary material for: Adherence to Positive Airway Pressure Therapy and Healthcare Resource Utilization and Costs Among Patients with Obstructive Sleep Apnea and Obesity
Source: Research Square preprint supplement (doi:10.21203/rs.3.rs-6986742/v1), 2025-07-03
Supplement: Supplementary file 4 [file bd4fdab54ff8a168a12e36f7.xlsx]

## Sheet: Sheet1
Table 3. Healthcare resource use and costs in years 1 and 2 in inverse probability of treatment weighted cohort, by adherence group
	Adherence			Pairwise P-value1
	Adherent n=61,171	Intermediate n=67,938	Non-adherent n=44,582	A-I	A-N	I-N
Year 1 HCRU, mean n (SD)
Physician visits	11.50 (11.98)	11.87 (12.12)	11.2 (11.6)	<0.001	<0.001	<0.001
All-cause emergency room visits	0.55 (1.77)	0.62 (1.68)	0.69 (1.78)	<0.001	<0.001	<0.001
All-cause hospitalizations	0.10 (0.44)	0.13 (0.53)	0.14 (0.56)	<0.001	<0.001	<0.001
Year 1 costs, mean (SD) $ US
Total (including OSA equipment)	11,332 (21,160)	11,947 (19,325)	11,927 (20,212)	0.005	<0.001	<0.001
Total (excluding OSA equipment)	10,223 (21,126)	10,957 (19,285)	11,214 (20,186)	<0.001	<0.001	0.969
Inpatient hospitalizations	1,384 (7,022)	1,854 (8,902)	2,116 (9,723)	<0.001	<0.001	<0.001
Emergency room visits	536 (2,236)	608 (1,794)	677 (1,852)	<0.001	<0.001	<0.001
Year 2 HCRU, mean n (SD)
Physician visits	9.92 (10.75)	10.17 (11.13)	9.87 (10.76)	0.022	0.01	<0.001
All-cause emergency room visits	0.497 (1.51)	0.59 (1.60)	0.65 (1.69)	<0.001	<0.001	<0.001
All-cause hospitalizations	0.09 ± 0.40	0.13 (0.53)	0.13 (0.56)	<0.001	<0.001	0.017
Year 2 costs, mean (SD) $US
Total (including OSA equipment)	10,531 (19,106)	11,437 (21,383)	11,226 (21,706)	0.987	<0.001	<0.001
Total (excluding OSA equipment)	10,092 (19,056)	11,159 (21,319)	11,115 (21,665)	<0.001	<0.001	0.879
Inpatient hospitalizations	1,239 (6,658)	1,886 (9,118)	1,984 (9,436)	<0.001	<0.001	0.018
Emergency room visits	503 (1,935)	594 (1,779)	649 (1,802)	<0.001	<0.001	<0.001
A, adherent; HCRU, healthcare resource use; I, intermediate adherence; N, non-adherent; OSA, obstructive sleep apnea; SD, standard deviation.
1P-values are based on Wilcoxon rank-sum tests.
